# Supplementary material for: Decoding emotional prosody: a unified brain network integrating gender and task type effect
Source: Research Square preprint supplement (doi:10.21203/rs.3.rs-6155286/v1), 2025-03-31
Supplement: Supplementary file 1 [file bb3a5a72e27b2748eab77e83.pdf]

Supplementary Materials for  
**Decoding emotional prosody: a unified brain network integrating gender and  
task type effect**

Pinyuan Hu *et al.*

\* Suyu Zhong, Email: zhongsuyu@bupt.edu.cn

**This PDF file includes:**

Supplementary Text  
Supplementary Figures 1 to 5  
Supplementary Tables 1 to 3

## Supplementary Text

### Supplementary methods

#### *Scan parameters of HCP dataset*

The T1-weighted MRI and resting-state Functional MRI in HCP were used in our study. For T1-weighted MRI, the parameters were as follows: Repetition Time (TR) = 2400 ms, Echo Time (TE) = 2.14 ms, Inversion Time (TI) = 1000 ms, flip angle = 8 degrees, Field of View (FOV) = 224×224 mm, voxel size = 0.7 mm isotropic, bandwidth = 210 Hz/Px, and total acquisition time = 7 minutes 40 seconds. The resting-state fMRI section were scanned by a gradient-echo EPI sequence with the following parameters: TR = 720 ms, TE = 33.1 ms, flip angle = 52 degrees, FOV = 208×180 mm, matrix size = 104×90, slice thickness = 2.0 mm, 72 slices, multiband factor = 8, echo spacing = 0.58 ms, and bandwidth = 2290 Hz/Px.

#### *Preprocessing of the gene expression data*

To identify the gene foundation of emotional prosody, the public gene expression data, Allen Human Brain Atlas (AHBA) (<http://human.brain-map.org>) were used. It offers transcriptomic data of 58,692 probes corresponding to 29,131 genes, derived from 3702 spatially distinct tissue samples collected from six postmortem adult brains. The gene expression data was processed as follows: First, probes without valid Entrez ID (total 12,871 probes) and those with expression values below the 50% of all probes (14,252 probes) were excluded, resulting in 31,569 probes for 15,633 genes. To identify a representative probe for each gene, we computed the Spearman correlation of expression values across brain regions for each donor pair and selected the probe with the highest average correlation, resulting in 15,633 representative probes. Subsequently, samples were matched to parcels in the Atlas of Intrinsic Connectivity of Homotopic Areas (AICHA, [www.gin.cnrs.fr/en/tools/aicha](http://www.gin.cnrs.fr/en/tools/aicha)). Parcels that did not match any samples were assigned the expression values of the tissue sample closest to the centroid of that region. Finally, expression values for each sample across genes for each donor were normalized using a scaled robust sigmoid normalization function, followed by normalization of expression values for each gene across samples for each donor. The expression values for all samples assigned to a region were averaged independently for each donor and then averaged across donors.

#### *Activation network derived from "t test" approach*

In "t test" approach, the Fisher Z maps were generated similarly to "overlap" approach in main study. However, the normative functional connectivity map for each experiment was identified in a different way. Specifically, the Fisher Z maps of LR and RL were averaged independently for each subject in HCP, and then averaged across subjects. Then we smoothed this average Fisher z map with a 6 mm FWHM Gaussian kernel to get normative functional connectivity map, while excluding white matter regions. Finally, these normative functional connectivity maps were compared against zero using a voxel wise one-sample t-test, with multiple comparisons corrected at cluster-level FWE  $P < 0.05$  (cluster-forming threshold at voxel-level  $P < 0.001$ ) via non-parametric permutation

tests implemented in Statistical non-Parametric Mapping (SnPM13, <http://warwick.ac.uk/snpm>, 10,000 permutations). The suprathreshold clusters were brain regions significantly connected to activation seeds across experiments.

To investigate the differences between EEP and IEP in three cohorts, or the differences between corresponding activation networks of male and female, voxel wise two-sample t-tests, with multiple comparisons corrected at cluster-level FWE  $P < 0.05$  (cluster-forming threshold at voxel-level  $P < 0.001$ , 10,000 permutations) were conducted.

## **Supplementary results**

### *Activation networks of emotional prosody calculated by "t test" approach*

For overall cohort, the activation network t map of EP was widely distributed, mainly in brain regions including bilateral SFG, right PcC, bilateral FP, bilateral MFG, bilateral Insular, bilateral LG, right OcP, bilateral TP, bilateral OFC, bilateral PreCG and bilateral PostCG (Supplementary Figure 3). Notably, the spatial distribution of activation network t map of EEP was quite similar to that of EP ( $r = 0.98$ ,  $p < 0.001$ ) (Supplementary Figure 4). However, for IEP, the activation network was mainly focused on bilateral TP, bilateral OFC, left PT.

The activation network t maps of EP and EEP for female and male were spatial correlated to that of overall cohort (correlation between F-EP and O-EP:  $r = 0.94$ ,  $p < 0.001$ ; correlation between F-EEP and O-EEP:  $r = 0.93$ ,  $p < 0.001$ ; correlation between M-EP and O-EP:  $r = 0.91$ ,  $p < 0.001$ ; correlation between M-EEP and O-EEP:  $r = 0.90$ ,  $p < 0.001$ ) (Supplementary Figure 4). For IEP, the activation network t maps of female and male were quite focused, mainly on bilateral TP, bilateral OFC and left PT (Supplementary Figure 3).

Additionally, we compared EEP and IEP in overall, female and male cohorts respectively. The comparison results were showed in Supplementary Figure 5B illustrated that for three cohorts, brain regions including left MFG, left SFG, left PreCG showed significantly stronger functional connectivity to activation seeds for EEP.

As shown in Supplementary Figure 5C, the activation network of EEP was broader than IEP, suggests that EEP requires the involvement of more brain regions for deeper processing.

### *Gender effects on activation networks calculated by "t test" approach*

The comparison analysis showed in Supplementary Figure 5A illustrated that, for EP and EEP, there were a set of brain regions whose functional connectivity to activation seeds for female were significantly stronger than that for male (mainly distributed in bilateral PcC, right AG, right Insular, bilateral LG, bilateral OcP, bilateral OFG, bilateral TOF, bilateral lcC, left TFCp, left PreCG, right COpC, bilateral Put). However, no brain region showed significant gender effect for IEP.

Additionally, the overlap analysis showed broader activation network t maps in female for EP and EEP. However, the gender-specific effect in IEP was not prominent due to the

localized distribution of activation network for female and male. (Supplementary Figure 5D)

*Consistent findings of "overlap" and "t test" approach*

The activation networks calculated by "overlap" and "t test" approach were consistently widespread and mainly distributed in Amygdala, bilateral IFG, bilateral Insular, bilateral STG, bilateral PreCG, bilateral PostCG, and these brain regions were demonstrated in previous studies to be involved in emotional prosody processing. Furthermore, the broader activation networks in female calculated by "overlap" approach showed in main study were also found in supplementary results calculated by "t test" approach. This demonstrated that female requires the involvement of more brain regions to process emotional prosody.

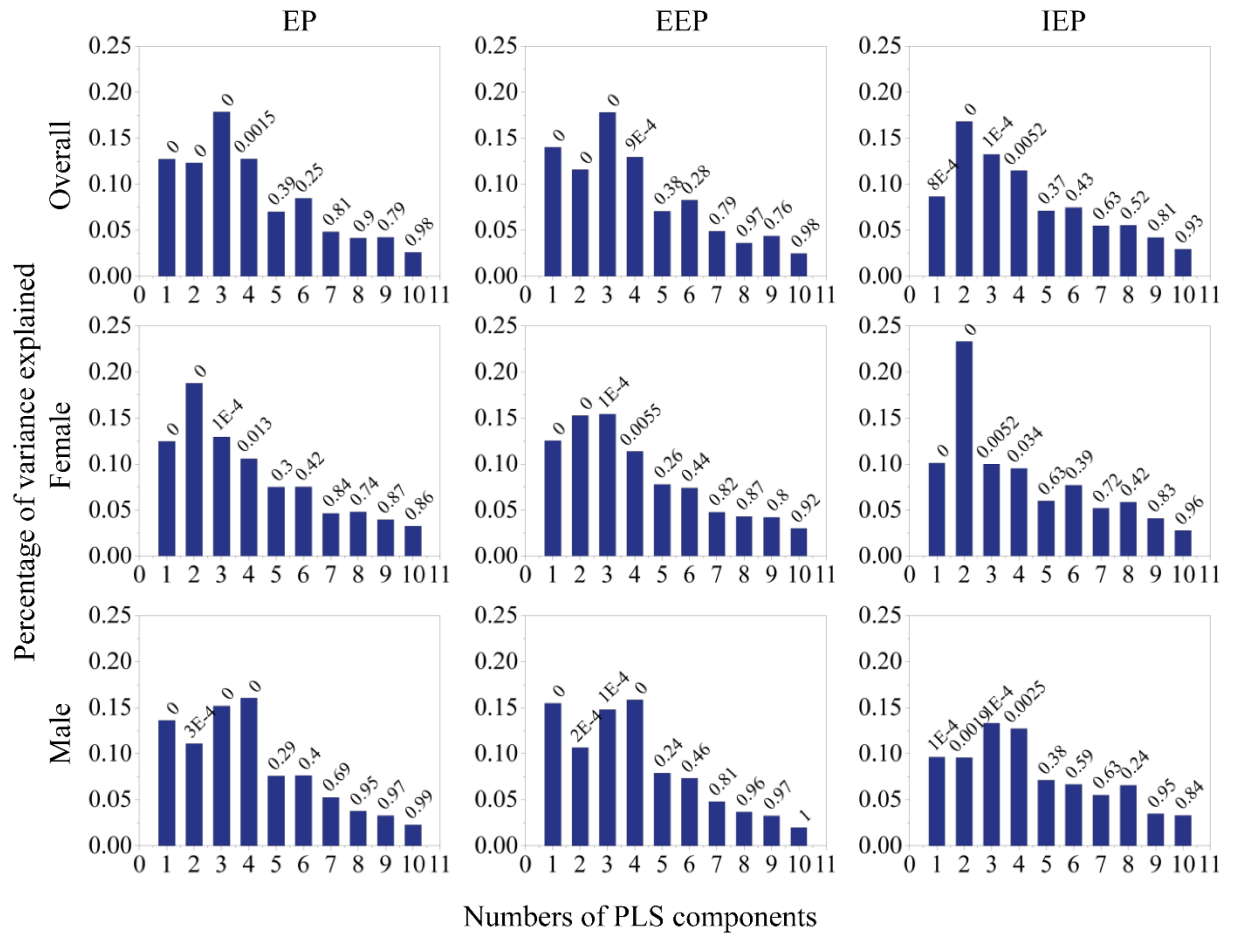

### Supplementary Figure 1.

Percentage of variance explained for 15 PLS components of each activation network. The number displayed at the top of the bars represent the permutation p-value for this component.

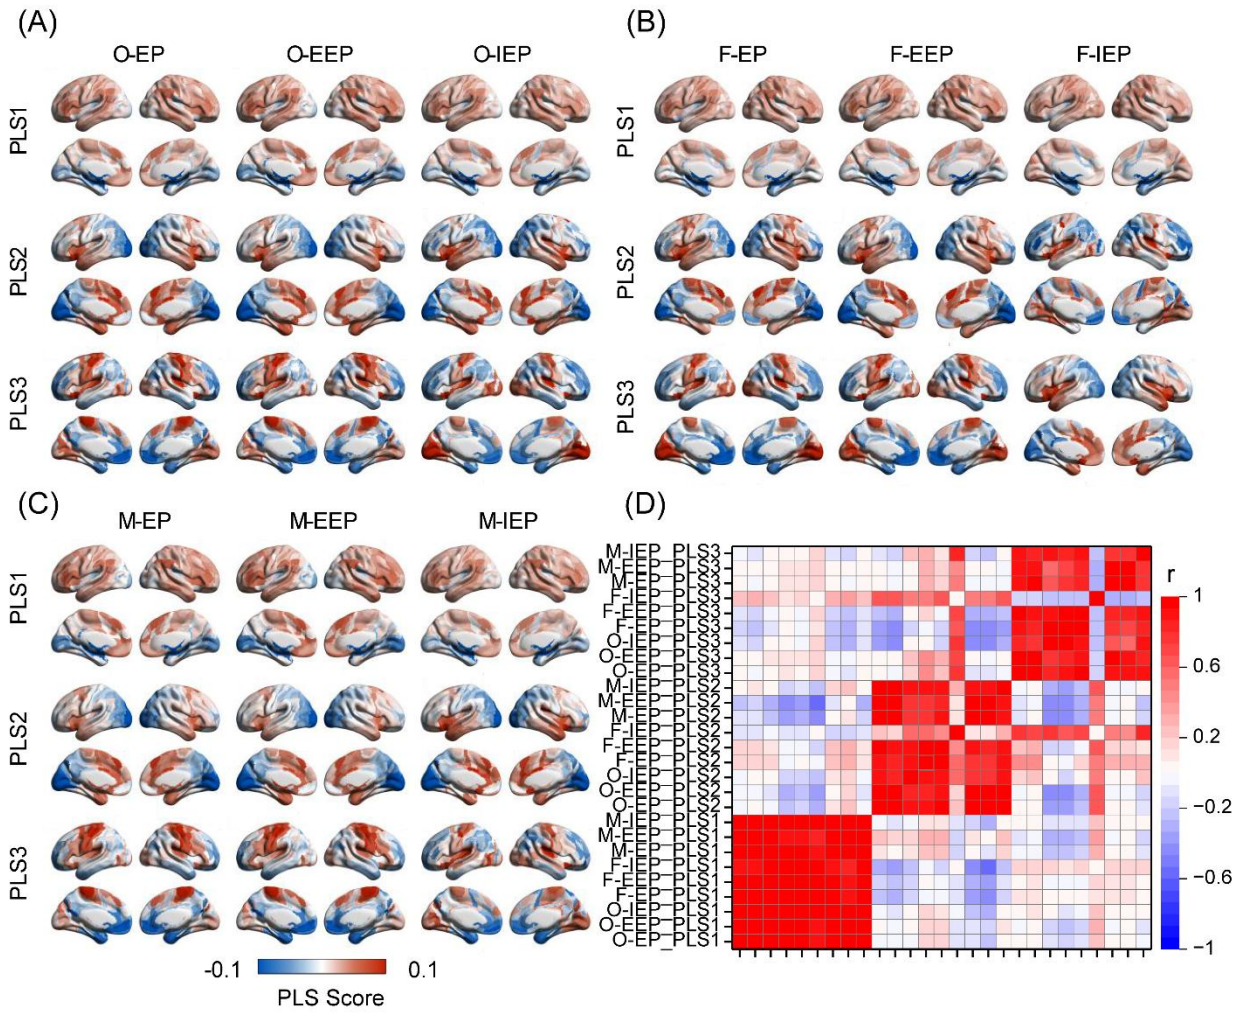

### Supplementary Figure 2.

The distribution of each significant PLS component of activation networks dependent on "overlap" approach. For overall (A), male (B) and female (C) cohort. (D) The correlation between significant PLS components for EP, EEP and IEP for overall, female and male.



(A) Activation networks of overall cohort

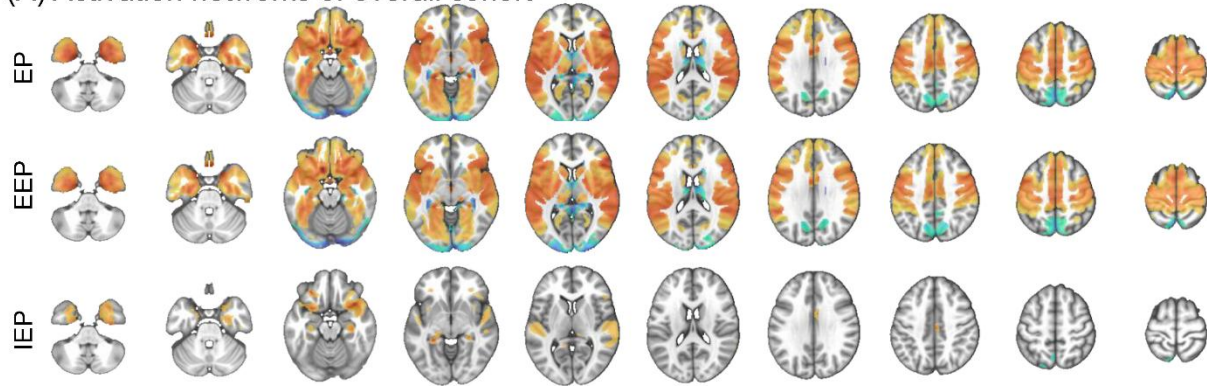

(B) Activation networks of female cohort

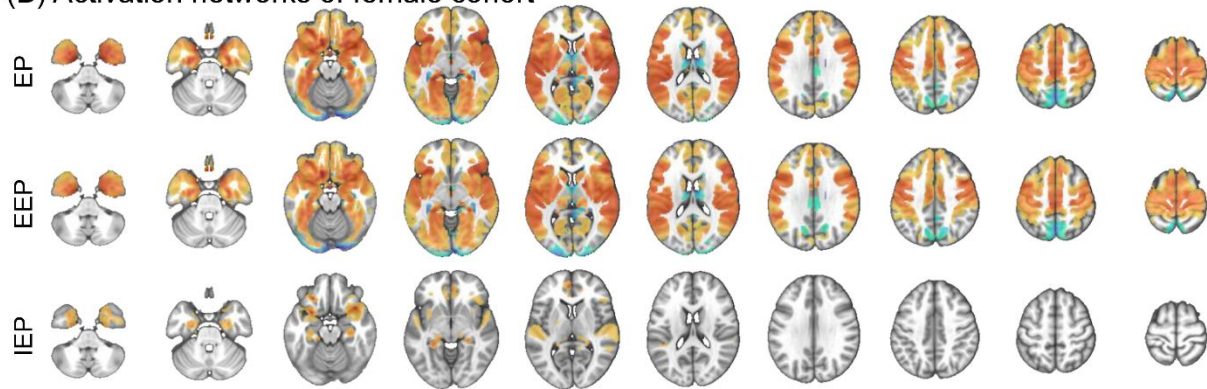

(C) Activation networks of male cohort

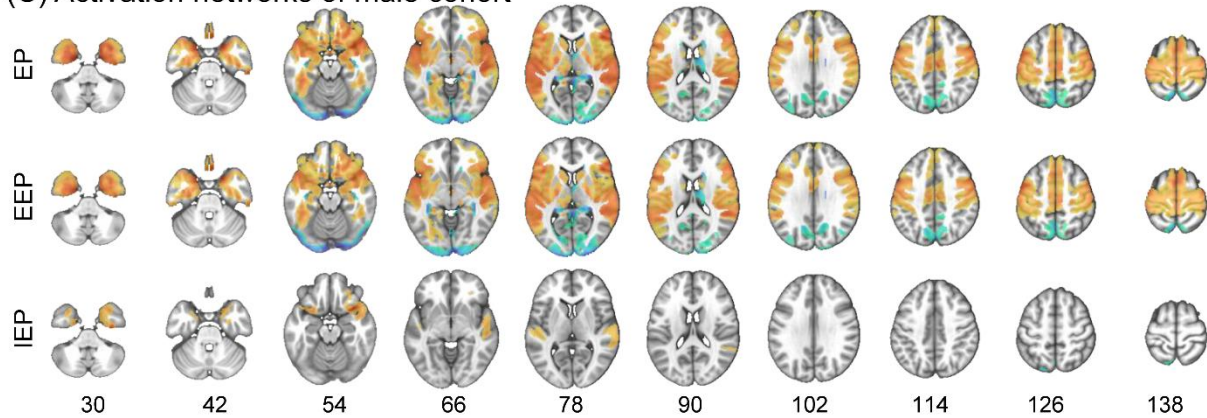

15 T value 15

**Supplementary Figure 3.**

Activation networks calculated by "t test" approach. EP, EEP and IEP activation network of overall (A), female (B) and male (C) cohorts.

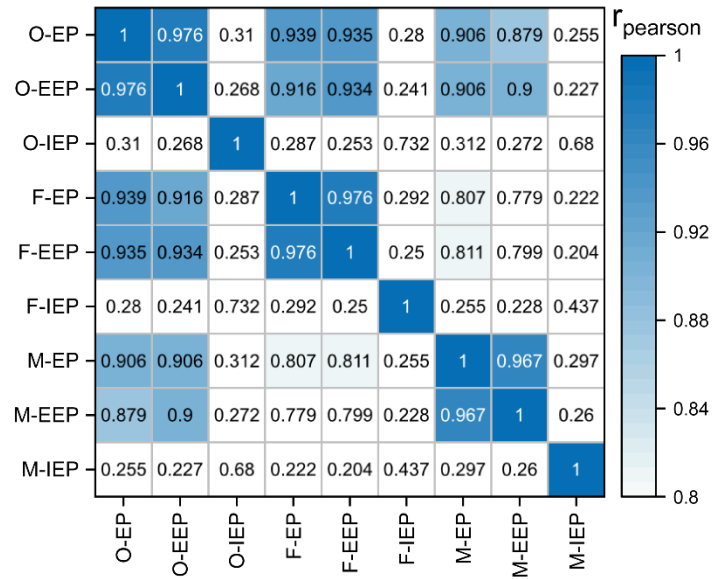

#### Supplementary Figure 4.

Correlation between activation networks based on "t test" approach.



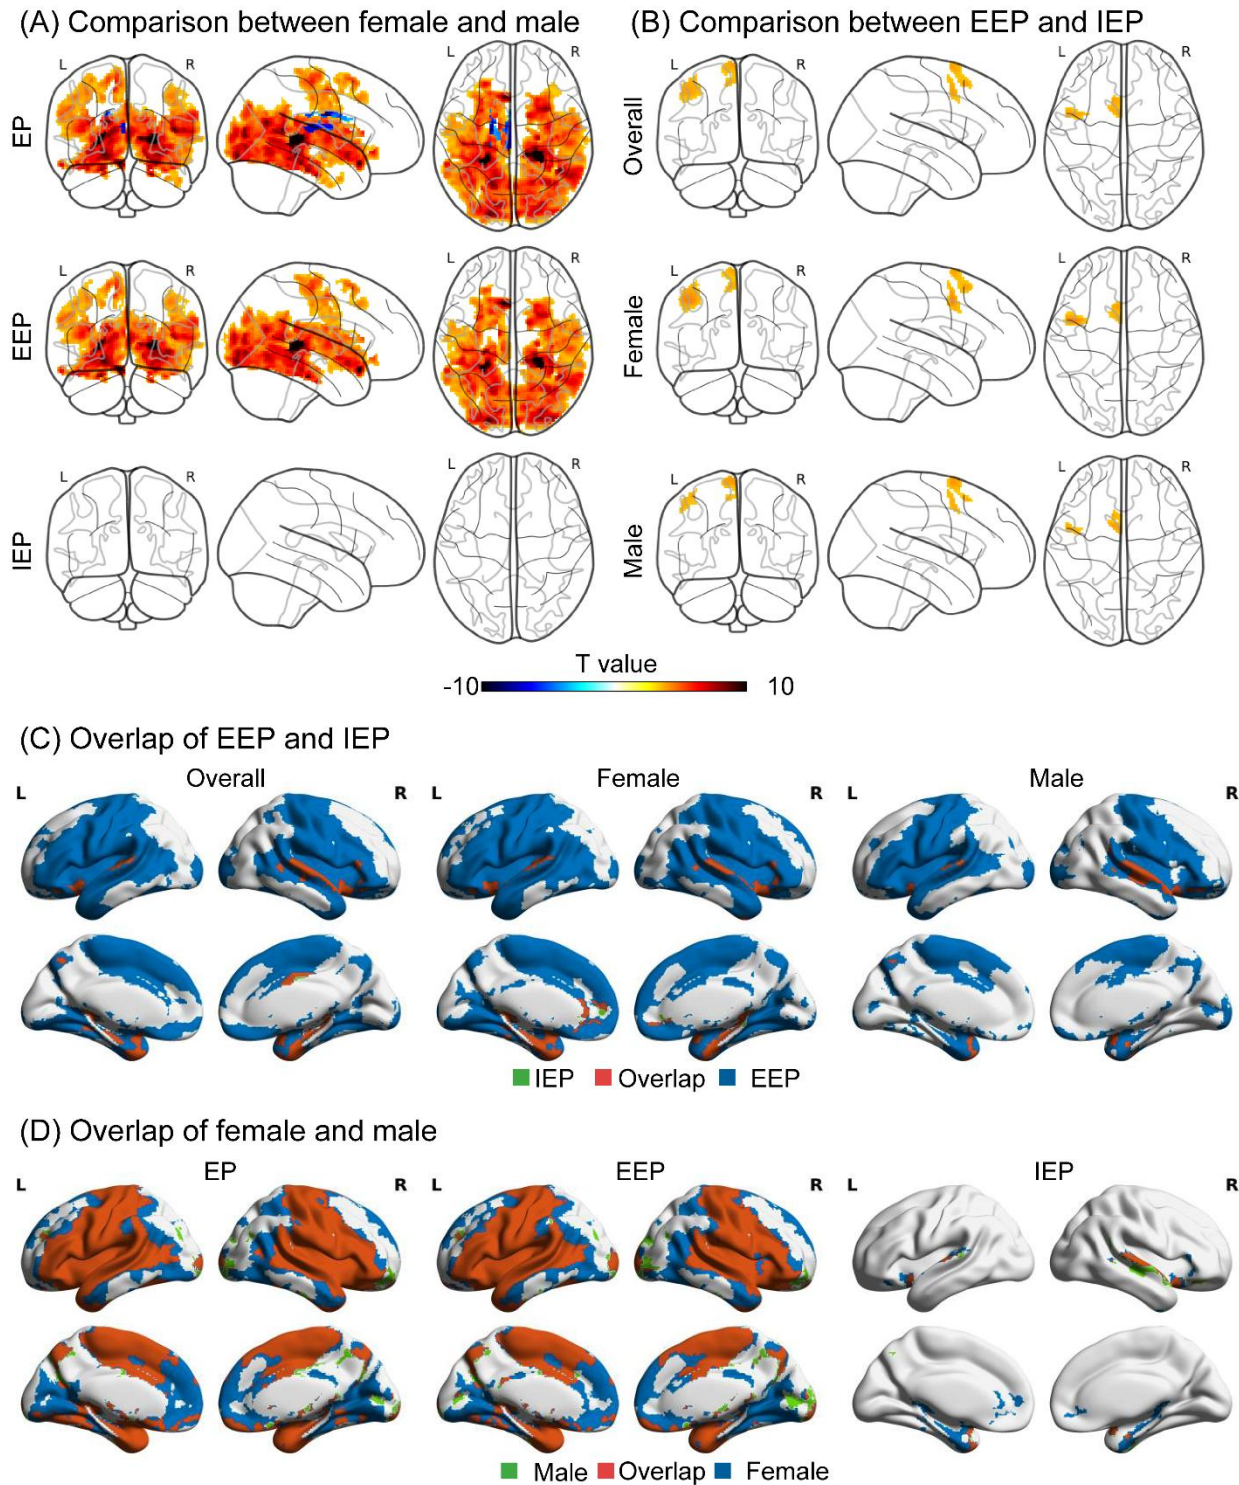

**Supplementary Figure 5.**

Comparison analysis results based on “t test” approach. (A) Gender difference networks of EP, EEP and IEP based on “t test” approach for overall, female and male. (B) Task type

difference networks of overall, female and male dependent on "t test" approach for EP, EEP and IEP. (C) Overlap of activation networks of EEP and IEP based on "t test" approach for overall, female and male. (D) Overlap of activation networks of female and male dependent on "t test" approach for EP, EEP and IEP.

**Supplementary Table 1.**  
Information of selected papers.

| Study                   | Year | Task Type            | Experimental task               | Control task                      | Contrasts                                               | No./Language of participants | No. of Foci    | Stereotaxic Space |
|-------------------------|------|----------------------|---------------------------------|-----------------------------------|---------------------------------------------------------|------------------------------|----------------|-------------------|
| Alba-Ferrara et al.     | 2011 | Explicit             | Categorization                  | Neutral                           | Emotion > Neutral                                       | 19/English                   | 12             | MNI               |
| Aryani et al.           | 2018 | Implicit             | Passive listening               | Semantic                          | Emotion (high arousal) > Emotion (low arousal)          | 28/German                    | 4              | MNI               |
| Bach et al.             | 2008 | Explicit             | Discrimination                  | Neutral + Gender discrimination   | Emotion > Neutral                                       | 16/German                    | 9              | MNI               |
| Beaucousin et al.       | 2007 | Explicit             | Discrimination                  | Grammar discrimination            | Emotional prosody > No prosody                          | 23/French                    | 20             | MNI               |
| Beaucousin et al.       | 2011 | Explicit             | Categorization                  | Grammar discrimination            | Emotion > Grammar                                       | 23/French                    | 20             | MNI               |
| Belyk et al.            | 2016 | Explicit             | Discrimination                  | Pitch contour discrimination      | Emotion > Rest                                          | 12/English                   | 26             | TAL               |
| Brück et al.            | 2011 | Explicit             | Discrimination                  | Semantic + Vowel                  | Emotion > Neutral                                       | 24/German                    | 4              | MNI               |
| Buchanan et al.         | 2000 | Explicit             | Detect Target                   | Phonetics                         | Sad > Verbal<br>Happy > Verbal<br>Emotion > Verbal      | 10/English                   | 2<br>1<br>3    | TAL               |
| Castelluccio et al.     | 2016 | Implicit             | Passive listening               | Neutral                           | Angry > Neutral                                         | 8/French                     | 8              | TAL               |
| Ceravolo et al.         | 2016 | Implicit             | Distance judgement              | Neutral                           | Aggressive > Neutral                                    | 14/French                    | 11             | MNI               |
| Ceravolo et al.         | 2021 | Explicit             | Same / Different                | Neutral                           | Emotion > Neutral<br>Angry > Neutral<br>Happy > Neutral | 19/French                    | 17<br>33<br>16 | MNI               |
| Dietrich et al.         | 2008 | Implicit             | Passive listening               | Neutral                           | Emotion > Neutral                                       | 16/German                    | 4              | MNI               |
| Elizalde Acevedo et al. | 2022 | Explicit             | Label                           | Neutral                           | Negative > Neutral                                      | 20/Spanish                   | 7              | MNI               |
| Escoffier et al.        | 2013 | Explicit             | Discrimination                  | Pitch                             | Emotion > Pitch                                         | 16/English                   | 2              | MNI               |
| Ethofer et al.          | 2006 | Explicit             | Discrimination + Rate           | Rate semantic emotion<br>semantic | Emotion > Neutral                                       | 24/German                    | 2              | MNI               |
|                         |      |                      |                                 |                                   | Affective prosody > Emotional word content              |                              | 3              |                   |
| Ethofer et al.          | 2009 | Explicit             | Discrimination                  | Neutral + Word class              | Angry > Neutral                                         | 24/German                    | 9              | MNI               |
|                         |      |                      |                                 |                                   | Emotional classification > Word classification          |                              | 4              |                   |
| Ethofer et al.          | 2012 | Explicit             | Discrimination                  | Neutral                           | Emotion > Neutral                                       | 22/German                    | 2              | MNI               |
| Frühholz et al.         | 2012 | Explicit & Implicit  | Discrimination                  | Neutral                           | angry > neutral                                         | 17/French                    | 14             | MNI               |
|                         |      | Explicit             | Prosody discrimination          |                                   |                                                         |                              | 19             |                   |
|                         |      |                      | Gender discrimination           |                                   |                                                         |                              | 11             |                   |
| Gandour et al.          | 2003 | Explicit             | Same / Different                | Passive listening                 | Emotion > Passive listening                             | 10/Mandarin<br>10/English    | 7<br>7         | TAL               |
| George et al.           | 1996 | Explicit             | Discrimination                  | Semantics, Repetition             | Emotion > Neutral                                       | 13/English                   | 1              | TAL               |
| Goerlich-Dobre et al.   | 2014 | Explicit             | Stress + Emotion discrimination | Neutral                           | Emotion > Neutral                                       | 22/Dutch                     | 6              | MNI               |
| Hervé et al.            | 2013 | Explicit             | Categorization                  | Grammar + Plausible judgement     | Emotion - Semantics > TOM-Semantics                     | 42/French                    | 9              | MNI               |
| Imaizumi et al.         | 1997 | Implicit vs Explicit | Discrimination                  | Speaker Identity                  | Implicit > Explicit, Emotion > Speaker                  | 6/Japanese                   | 11             | TAL               |
| Koch et al.             | 2017 | Explicit             | Rate                            | Neutral                           | Emotion > Neutral                                       | 30/German                    | 9              | MNI               |

## Supplementary Table 1 (continued).

Information of selected papers.

| Study                    | Year | Task Type | Experimental task                       | Control task           | Contrasts                                     | No./Language of participants | No. of Foci | Stereotaxic Space |
|--------------------------|------|-----------|-----------------------------------------|------------------------|-----------------------------------------------|------------------------------|-------------|-------------------|
| Kotz et al.              | 2003 | Explicit  | Discrimination                          | Neutral                | Prosody speech > Normal speech                | 12/German                    | 8           | TAL               |
| Maurage et al.           | 2013 | Explicit  | Emotion judgement                       | Rest                   | Anger > Rest<br>Fear > Rest                   | 24/English                   | 7<br>8      | MNI               |
| Mitchell et al.          | 2003 | Implicit  | Passive listening                       | Neutral Rest           | emotion > neutral<br>emotion > rest           | 13/English                   | 6<br>5      | TAL               |
|                          |      | Explicit  | Attend to prosody                       | Attend to semantic     | attention to prosody > attention to semantics |                              | 3           |                   |
| Park et al.              | 2014 | Implicit  | Passive listening                       | Neutral                | Emotion > Neutral                             | 24/German                    | 2           | MNI               |
| Péron et al.             | 2016 | Explicit  | Discrimination                          | Gender + Neutral       | Emotion > Neutral                             | 15/French                    | 14          | MNI               |
| Quadflieg et al.         | 2008 | Explicit  | Discrimination                          | Neutral                | Angry > Neutral                               | 12/German                    | 11          | TAL               |
| Razafimandimby et al.    | 2016 | Explicit  | Categorization                          | Grammar discrimination | Emotion > Grammar                             | 25/French                    | 6           | MNI               |
| Rosenblau et al.         | 2016 | Explicit  | Label                                   | Gender                 | Emotion > Neutral                             | 20/German                    | 13          | MNI               |
| Rota et al.              | 2008 | Explicit  | Categorization                          | Neutral                | Emotion > Rest                                | 10/German                    | 9           | MNI               |
| Seydell-Greenwald et al. | 2020 | Explicit  | Discrimination                          | Neutral                | Emotion > Neutral                             | 20/English                   | 9           | TAL               |
| Smith, et al.            | 2015 | Implicit  | Active Reasoning                        | Neutral                | Emotion > Neutral<br>Sad > Neutral            | 17/French                    | 2<br>2      | MNI               |
| Wiethoff, et al.         | 2008 | Implicit  | Passive listening                       | Neutral                | Emotion > Neutral                             | 24/German                    | 4           | MNI               |
| Wildgruber               | 2004 | Explicit  | Discrimination                          | Linguistic             | Emotion > Rest                                | 10/German                    | 13          | MNI               |
| Wildgruber et al.        | 2002 | Explicit  | Identification, Relative expressiveness | 2nd > 1st stimulus     | Sentence 1 (emotion) > Neutral                | 12/German                    | 11<br>9     | MNI               |
| Wildgruber et al.        | 2005 | Explicit  | Identification                          | Phonetics Rest         | Emotion > Vowel<br>Emotion > Rest             | 10/German                    | 2<br>17     | MNI               |

**Supplementary Table 2.**

Wilcoxon rank-sum test between female and male (female-male) for the overlap proportion in 7 Yeo sub network.

|             | VN         | SMN         | DAN        | VAN        | LN | FPN         | DMN         |
|-------------|------------|-------------|------------|------------|----|-------------|-------------|
| EP          |            | 33.43       | 7.45       | 12.95      |    | 21.49       | 26.23       |
| z value (p) | -          | (4.69e-245) | (9.20e-14) | (2.47e-38) | -  | (1.78e-102) | (1.09e-151) |
| EEP         | 5.53       | 41.51       | 13.11      | 17.73      |    | 32.34       | 30.18       |
| z value (p) | (3.24e-08) | (0)         | (2.83e-39) | (2.54e-70) | -  | (1.93e-229) | (4.36e-200) |
| IEP         |            | 16.50       | 0.57       | 6.34       |    | 0.39        | 5.99        |
| z value (p) | -          | (3.98e-61)  | (0.57)     | (2.23e-10) | -  | (0.70)      | (2.10e-09)  |

note: for the cells marked with '-', there was no voxel involved in the corresponding subnetwork in the activation network for male, the Wilcoxon rank-sum test cannot be performed.

**Supplementary Table 3.**

Corresponding terms of each enrichment ID.

| Dataset | Index | ID         | Term                                                                      |
|---------|-------|------------|---------------------------------------------------------------------------|
| BP      | 1     | GO:0070646 | protein modification by small protein removal                             |
| BP      | 2     | GO:0016072 | rRNA metabolic process                                                    |
| BP      | 3     | GO:0022613 | ribonucleoprotein complex biogenesis                                      |
| BP      | 4     | GO:0034470 | ncRNA processing                                                          |
| BP      | 5     | GO:0003018 | vascular process in circulatory system                                    |
| BP      | 6     | GO:0007264 | small GTPase mediated signal transduction                                 |
| BP      | 7     | GO:0009410 | response to xenobiotic stimulus                                           |
| BP      | 8     | GO:0015711 | organic anion transport                                                   |
| BP      | 9     | GO:0033865 | nucleoside bisphosphate metabolic process                                 |
| BP      | 10    | GO:0015850 | organic hydroxy compound transport                                        |
| BP      | 11    | GO:0006720 | isoprenoid metabolic process                                              |
| BP      | 12    | GO:0030258 | lipid modification                                                        |
| BP      | 13    | GO:0006790 | sulfur compound metabolic process                                         |
| BP      | 14    | GO:0010876 | lipid localization                                                        |
| BP      | 15    | GO:1901293 | nucleoside phosphate biosynthetic process                                 |
| BP      | 16    | GO:0006520 | amino acid metabolic process                                              |
| BP      | 17    | GO:0016053 | organic acid biosynthetic process                                         |
| BP      | 18    | GO:0007188 | adenylate cyclase-modulating G protein-coupled receptor signaling pathway |
| BP      | 19    | GO:0006066 | alcohol metabolic process                                                 |
| BP      | 20    | GO:0072522 | purine-containing compound biosynthetic process                           |
| BP      | 21    | GO:0019693 | ribose phosphate metabolic process                                        |
| BP      | 22    | GO:0016042 | lipid catabolic process                                                   |
| BP      | 23    | GO:0044282 | small molecule catabolic process                                          |
| BP      | 24    | GO:0006631 | fatty acid metabolic process                                              |
| CC      | 1     | GO:0009897 | external side of plasma membrane                                          |
| CC      | 2     | GO:0031253 | cell projection membrane                                                  |
| CC      | 3     | GO:0098857 | membrane microdomain                                                      |
| CC      | 4     | GO:0098984 | neuron to neuron synapse                                                  |
| CC      | 5     | GO:0099572 | postsynaptic specialization                                               |
| CC      | 6     | GO:1990351 | transporter complex                                                       |
| CC      | 7     | GO:1904949 | ATPase complex                                                            |
| CC      | 8     | GO:0098978 | glutamatergic synapse                                                     |
| CC      | 9     | GO:0043292 | contractile fiber                                                         |
| CC      | 10    | GO:0031983 | vesicle lumen                                                             |
| CC      | 11    | GO:0045177 | apical part of cell                                                       |
| CC      | 12    | GO:0072562 | blood microparticle                                                       |
| CC      | 13    | GO:0044309 | neuron spine                                                              |
| CC      | 14    | GO:0045178 | basal part of cell                                                        |
| CC      | 15    | GO:0042579 | microbody                                                                 |
| CC      | 16    | GO:0097060 | synaptic membrane                                                         |
| CC      | 17    | GO:0062023 | collagen-containing extracellular matrix                                  |
| CC      | 18    | GO:0031252 | cell leading edge                                                         |
| CC      | 19    | GO:0005759 | mitochondrial matrix                                                      |
| MF      | 1     | GO:0001217 | DNA-binding transcription repressor activity                              |
| MF      | 2     | GO:0001216 | DNA-binding transcription activator activity                              |
| MF      | 3     | GO:0019783 | ubiquitin-like protein peptidase activity                                 |
| MF      | 4     | GO:0016755 | Aminoacyl transferase activity                                            |
| MF      | 5     | GO:0008234 | cysteine-type peptidase activity                                          |
| MF      | 6     | GO:0032182 | ubiquitin-like protein binding                                            |
| MF      | 7     | GO:0140313 | molecular sequestering activity                                           |
| MF      | 8     | GO:0005178 | integrin binding                                                          |
| MF      | 9     | GO:0016298 | lipase activity                                                           |
| MF      | 10    | GO:0016874 | ligase activity                                                           |



### Supplementary Table 3 (continued).

Corresponding terms of each enrichment ID.

| Dataset | Index | ID            | Term                                                                   |
|---------|-------|---------------|------------------------------------------------------------------------|
| MF      | 11    | GO:0019001    | guanyl nucleotide binding                                              |
| MF      | 12    | GO:0016776    | phosphotransferase activity, phosphate group as acceptor               |
| MF      | 13    | GO:0046982    | protein heterodimerization activity                                    |
| MF      | 14    | GO:0016903    | oxidoreductase activity, acting on the aldehyde or oxo group of donors |
| MF      | 15    | GO:0016810    | hydrolase activity, acting on carbon-nitrogen (but not peptide) bonds  |
| MF      | 25    | GO:0060589    | nucleoside-triphosphatase regulator activity                           |
| MF      | 26    | GO:0022804    | active transmembrane transporter activity                              |
| MF      | 27    | GO:0016887    | ATP hydrolysis activity                                                |
| Pathway | 1     | hsa05168      | Herpes simplex virus 1 infection                                       |
| Pathway | 2     | hsa00230      | Purine metabolism                                                      |
| Pathway | 3     | hsa04024      | cAMP signaling pathway                                                 |
| Pathway | 4     | hsa04261      | Adrenergic signaling in cardiomyocytes                                 |
| Pathway | 5     | hsa04270      | Vascular smooth muscle contraction                                     |
| Pathway | 6     | hsa04530      | Tight junction                                                         |
| Pathway | 7     | hsa04936      | Alcoholic liver disease                                                |
| Pathway | 8     | hsa01232      | Nucleotide metabolism                                                  |
| Pathway | 9     | hsa04666      | Fc gamma R-mediated phagocytosis                                       |
| Pathway | 10    | hsa04976      | Bile secretion                                                         |
| Pathway | 11    | hsa04914      | Progesterone-mediated oocyte maturation                                |
| Pathway | 12    | hsa00640      | Propanoate metabolism                                                  |
| Pathway | 13    | hsa01240      | Biosynthesis of cofactors                                              |
| Pathway | 14    | hsa04714      | Thermogenesis                                                          |
| Pathway | 15    | hsa04913      | Ovarian steroidogenesis                                                |
| Pathway | 16    | hsa04072      | Phospholipase D signaling pathway                                      |
| Pathway | 17    | hsa00280      | Valine, leucine and isoleucine degradation                             |
| Pathway | 18    | hsa04211      | Longevity regulating pathway                                           |
| Pathway | 19    | hsa04926      | Relaxin signaling pathway                                              |
| Pathway | 20    | hsa04146      | Peroxisome                                                             |
| Pathway | 21    | hsa05132      | Salmonella infection                                                   |
| Pathway | 22    | hsa01212      | Fatty acid metabolism                                                  |
| Pathway | 23    | hsa04022      | cGMP-PKG signaling pathway                                             |
| Pathway | 24    | hsa00071      | Fatty acid degradation                                                 |
| Pathway | 25    | hsa02010      | ABC transporters                                                       |
| Pathway | 26    | hsa01100      | Metabolic pathways                                                     |
| Disease | 1     | umls:C0027765 | nervous system disorder                                                |
| Disease | 2     | umls:C0242656 | Disease Progression                                                    |
| Disease | 3     | umls:C0003130 | Anoxia                                                                 |
| Disease | 4     | umls:C0002395 | Alzheimer's Disease                                                    |
| Disease | 5     | umls:C0004352 | Autistic Disorder                                                      |
